# Supplementary material
Source: publisher figshare collection journal article supplement (https://karger.figshare.com/ndownloader/files/8956321)
Supplement: Supplementary file 1 [file 8956321]

## Erratum

---

In the article by Chen et al., entitled 'Culture qualitatively but not quantitatively influences performance in the Boston Naming Test in a Chinese-speaking population' [Dement Geriatr Cogn Disord Extra 2014;4:86–94, DOI: 10.1159/000360695], the following acknowledgments were erroneously left out:

### Acknowledgment

This work was supported in part by the National Science Council (NSC 101-2314-B-010-064, NSC 102-2314-B-010-051-MY2) and the Taipei Veterans General Hospital (V96C1-061, V101E7-001, V102E9-004). The authors also acknowledge MR support from the Ministry of Education of Taiwan (Aim for the Top University Plan).
